# Supplementary material
Source: publisher figshare collection journal article supplement (https://tandf.figshare.com/articles/dataset/_/19573490)
Supplement: Supplementary file 3 [file 1]

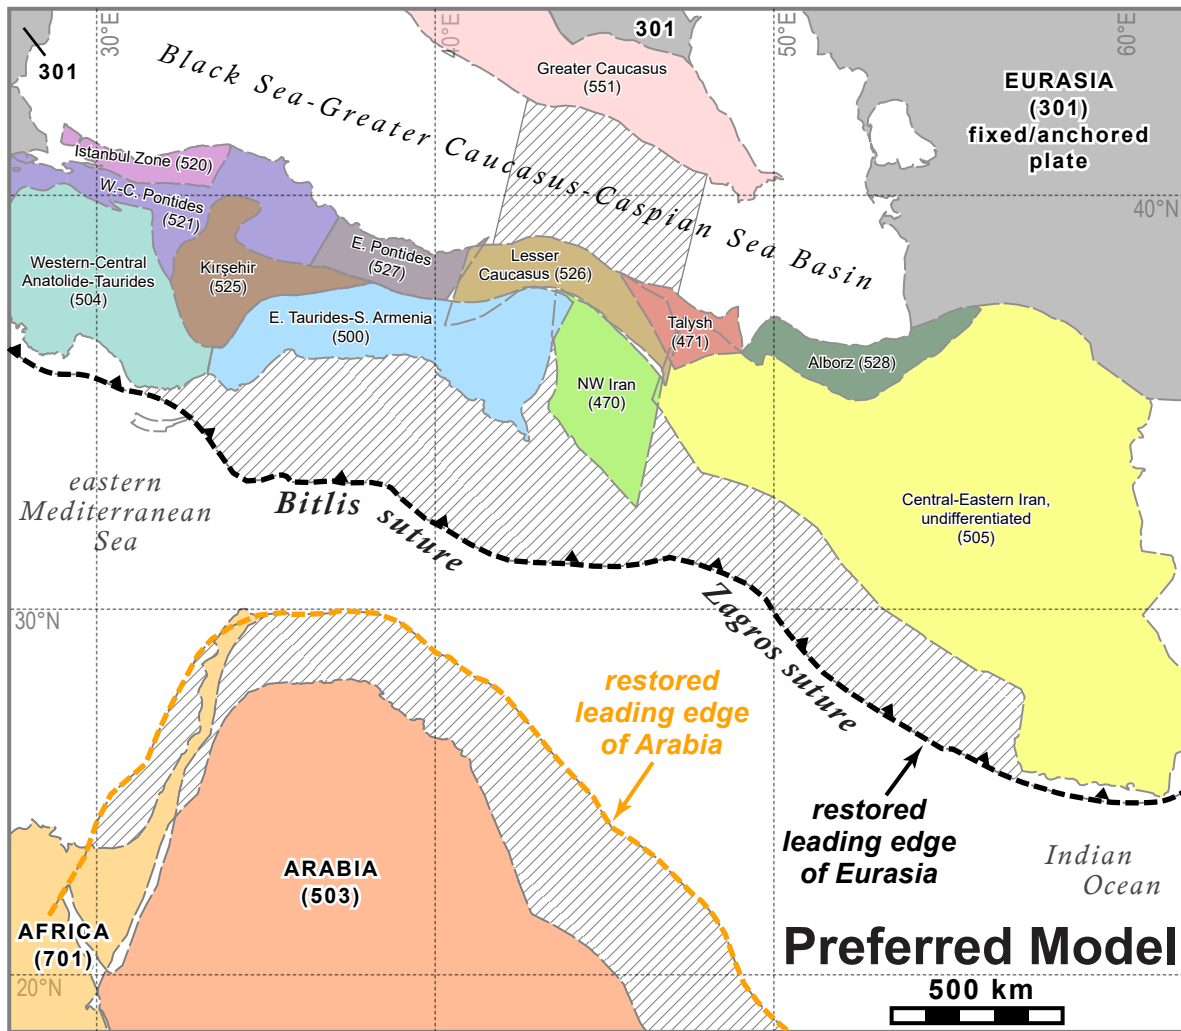

**Figure S2.** Preferred model at 60 Ma showing all tectonic blocks (colored) in our reconstructions. Each block is labelled by its name and unique three-digit plate ID number in GPlates; see Appendix S1 for instructions on how to install and load the included GPlates files. Hachured areas indicate model restorations; see text for details. Graticule is shown for reference only and applies only to the stable Eurasia plate at present day.
